# Supplementary material
Source: PubMed Central journal article supplement (PMC7195440)
Supplement: mmc1.pdf [file mmc1.pdf]

# THE LANCET

## Supplementary appendix

This appendix formed part of the original submission. We post it as supplied by the authors.

Supplement to: Torres I, Sacoto F. Localising an asset-based COVID-19 response in Ecuador. *Lancet* 2020; published online April 8. [http://dx.doi.org/10.1016/S0140-6736\(20\)30851-5](http://dx.doi.org/10.1016/S0140-6736(20)30851-5).

**Number of people tested for COVID-19, confirmed cases, and deaths from COVID-19 in Ecuador between March 19 and April 3, 2020**

| Date (2020) | Cumulative # of tests | Total confirmed cases | Confirmed cases Guayas | Confirmed cases Pichincha | People tested per day | Confirmed cases per day | Cumulative confirmed deaths | Confirmed deaths per day |
|-------------|-----------------------|-----------------------|------------------------|---------------------------|-----------------------|-------------------------|-----------------------------|--------------------------|
| March 19    | 1153                  | 260                   | 187                    | 16                        | 391                   | 92                      | 4                           | 1                        |
| March 20    | 1670                  | 426                   | 318                    | 35                        | 517                   | 166                     | 7                           | 3                        |
| March 21    | 2051                  | 532                   | 397                    | 50                        | 381                   | 106                     | 7                           | 0                        |
| March 22    | 2360                  | 789                   | 607                    | 60                        | 309                   | 257                     | 14                          | 7                        |
| March 23    | 2780                  | 981                   | 769                    | 65                        | 420                   | 192                     | 18                          | 4                        |
| March 24    | 3618                  | 1082                  | 826                    | 72                        | 838                   | 101                     | 27                          | 9                        |
| March 25    | 4290                  | 1211                  | 885                    | 108                       | 672                   | 129                     | 29                          | 2                        |
| March 26    | 5090                  | 1403                  | 1021                   | 121                       | 800                   | 192                     | 34                          | 5                        |
| March 27    | 5915                  | 1627                  | 1202                   | 137                       | 825                   | 224                     | 41                          | 7                        |
| March 28    | 6615                  | 1835                  | 1345                   | 171                       | 700                   | 208                     | 48                          | 7                        |
| March 29    | 6992                  | 1924                  | 1377                   | 188                       | 377                   | 89                      | 58                          | 10                       |
| March 30    | 7451                  | 1966                  | 1397                   | 191                       | 459                   | 42                      | 58                          | 0                        |
| March 31    | 7982                  | 2240                  | 1563                   | 211                       | 531                   | 274                     | 75                          | 17                       |
| April 1     | 9019                  | 2758                  | 1941                   | 248                       | 1037                  | 518                     | 93                          | 18                       |
| April 2     | 9604                  | 3163                  | 2243                   | 259                       | 585                   | 405                     | 120                         | 27                       |
| April 3     | 10317                 | 3368                  | 2388                   | 285                       | 713                   | 205                     | 145                         | 25                       |

**Source:** Ministry of Health of Ecuador. COVID-19 Epidemiological Bulletins. 2020. <https://www.salud.gob.ec/gacetitas-epidemiologicas-coronavirus-covid-19/> (in Spanish)
